# Supplementary material for: Exploring efflux pump inhibition through oxytetracycline analogues: In silico approaches to tackle tetracycline resistance
Source: Research Square preprint supplement (doi:10.21203/rs.3.rs-7781463/v1), 2025-10-07
Supplement: Supplementary file 1 [file 32cba91835a4cb763aeec89d.docx]

**Supplementary Data for “*Exploring efflux pump inhibition through oxytetracycline analogues: In silico approaches to tackle tetracycline resistance*”**

**Accession No. of Protein:** WP_011116969

**Sequence of Protein:** MKTYSWFVPPAPPADDPARLHPARWSSGNRVVRDMVGAYPGVLVLHILSYLIGSGISAFVPVVVGMIVDGLVGEEKFNAWWLFAVLVGIFIIQFIGEATGDGLATASVRRVTHNAQQHLSSGVLRRGAGAMSPGTVLNTIDADANTVGRYRELLSFPLMAIGYAVCAMVAMWSVSPWISLAIPASALIIALFAAWTAGPVTRVSLKRRAAEADVAGLATDASQGIRTVKGLGAGATVATRFHAETAKANGLMLTHLRVEVWLGFARFCVAWLCNLGIVGLSAWMTLRGEITPGQLTSVALLVQPALTMAGLAFGDLASGWGRAVASGQRIEQLHHAGDDAAGPEPTDTPVPGAGLWILEPAERSYATAAAWAQRADVLFPPHTVNVFEGTIADNVNPRGDVPEDVVKQALAAAHCQDILRRLGGINEAGELPDAPLGEAGLNLSGGQRQRVALARALAADPEVLILDDPTTGLDSVTQADVVAAVAALRADKTTVVITGNAAWQHAGTELEVA

**Information of 19 detected docking sites**

| **ID** | **Cavity Volume** | **Center** | **Dimension** |
| --- | --- | --- | --- |
| 1 | 644 | 1.457,11.361,13.388 | 12 11 15 |
| 2 | 477 | -10.122,-3.859,-8.592 | 12 10 15 |
| 3 | 358 | 17.843,-14.196,-26.115 | 16 6 15 |
| 4 | 348 | -16.873,17.038,11.984 | 12 8 7 |
| 5 | 144 | 27.983,-3.301,12.700 | 7 7 8 |
| 6 | 137 | -25.040,11.623,5.024 | 9 7 5 |
| 7 | 129 | -19.921,4.124,13.497 | 9 7 6 |
| 8 | 116 | 32.993,1.792,-31.552 | 9 9 14 |
| 9 | 112 | 32.299,-9.563,13.571 | 8 5 5 |
| 10 | 97 | 33.442,-9.313,-22.045 | 5 8 3 |
| 11 | 90 | 13.854,-3.919,-11.298 | 9 4 6 |
| 12 | 89 | 19.647,-17.734,-38.404 | 6 6 6 |
| 13 | 89 | -44.933,6.278,23.309 | 6 9 10 |
| 14 | 82 | 17.083,7.700,-11.594 | 6 5 7 |
| 15 | 79 | 40.091,-5.684,-28.941 | 5 9 8 |
| 16 | 75 | 19.074,-30.083,-32.675 | 8 4 5 |
| 17 | 74 | -35.500,12.535,13.642 | 5 9 5 |
| 18 | 69 | 23.843,-4.576,-39.519 | 7 9 6 |
| 19 | 69 | -24.642,2.853,-2.618 | 8 7 11 |

**Top 7 docking results for all ligands**

| Ligand | Interaction ID | Binding Affinity | Cavity Volume |
| --- | --- | --- | --- |
| Beta Oppo. Oxytetracycline | 1 | -6.1 | 647 |
| 2 | -6.1 | 477 |
| 3 | -6.8 | 358 |
| 4 | -5.9 | 348 |
| 5 | -7.1 | 144 |
| 6 | -5.9 | 137 |
| 7 | -6.6 | 129 |
| Oxytetracycline | 1 | -6.5 | 647 |
| 2 | -7.8 | 477 |
| 3 | -6.9 | 358 |
| 4 | -6.1 | 348 |
| 5 | -5.9 | 144 |
| 6 | -5.5 | 137 |
| 7 | -5.8 | 129 |
| Chlortetracycline | 1 | -6.5 | 647 |
| 2 | -7.0 | 477 |
| 3 | -7.2 | 358 |
| 4 | -6.6 | 348 |
| 5 | -6.0 | 144 |
| 6 | -4.8 | 137 |
| 7 | -5.8 | 129 |
| Doxycycline | 1 | -6.3 | 647 |
| 2 | -8.0 | 477 |
| 3 | -7.0 | 358 |
| 4 | -6.0 | 348 |
| 5 | -6.0 | 144 |
| 6 | -5.2 | 137 |
| 7 | -5.9 | 129 |
| Eravacycline | 1 | -7.4 | 647 |
| 2 | -7.3 | 477 |
| 3 | -7.5 | 358 |
| 4 | -6.8 | 348 |
| 5 | -6.0 | 144 |
| 6 | -6.4 | 137 |
| 7 | -6.9 | 129 |
| Glycylcycline | 1 | -6.9 | 647 |
| 2 | -7.5 | 477 |
| 3 | -7.1 | 358 |
| 4 | -6.5 | 348 |
| 5 | -6.3 | 144 |
| 6 | -6.0 | 137 |
| 7 | -6.7 | 129 |
| Omadacycline | 1 | -6.6 | 647 |
| 2 | -.6.6 | 477 |
| 3 | -8.3 | 358 |
| 4 | -6.8 | 348 |
| 5 | -5.3 | 144 |
| 6 | -5.6 | 137 |
| 7 | -6.7 | 129 |
| Sarecycline | 1 | -6.2 | 647 |
| 2 | -6.5 | 477 |
| 3 | -7.2 | 358 |
| 4 | -5.7 | 348 |
| 5 | -6.1 | 144 |
| 6 | -5.5 | 137 |
| 7 | -6.1 | 129 |
| Tigecycline | 1 | -7.0 | 647 |
| 2 | -7.3 | 477 |
| 3 | -7.6 | 358 |
| 4 | -6.3 | 348 |
| 5 | -5.8 | 144 |
| 6 | -5.4 | 137 |
| 7 | -6.7 | 129 |
| Tetracycline | 1 | -6.5 | 647 |
| 2 | -8.0 | 477 |
| 3 | -7.0 | 358 |
| 4 | -6.8 | 348 |
| 5 | -6.0 | 144 |
| 6 | -5.7 | 137 |
| 7 | -5.8 | 129 |
| TP-271 | 1 | -7.2 | 647 |
| 2 | -7.7 | 477 |
| 3 | -8.1 | 358 |
| 4 | -7.0 | 348 |
| 5 | -6.3 | 144 |
| 6 | -6.3 | 137 |
| 7 | -7.1 | 129 |
| TP-6076 | 1 | -6.1 | 647 |
|  | 2 | -6.7 | 477 |
|  | 3 | -6.8 | 358 |
|  | 4 | -6.6 | 348 |
|  | 5 | -7.0 | 144 |
|  | 6 | -6.0 | 137 |
|  | 7 | -6.3 | 129 |
